# Supplementary material for: Diagnosis of cytomegalovirus pneumonia by quantitative polymerase chain reaction using bronchial washing fluid from patients with hematologic malignancies
Source: PubMed Central journal article supplement (PMC5503648; doi:10.18632/oncotarget.14504), 2017-01-04
Supplement: oncotarget-08-39736-s001.pdf [file oncotarget-08-39736-s001.pdf]

## Diagnosis of cytomegalovirus pneumonia by quantitative polymerase chain reaction using bronchial washing fluid from patients with hematologic malignancies

Hwa Young Lee<sup>1,\*</sup>, Chin Kook Rhee<sup>1,\*</sup>, Joon Young Choi<sup>1</sup>, Hea Yon Lee<sup>1</sup>, Jong Wook Lee<sup>2,3</sup> and Dong Gun Lee<sup>3,4,5</sup>

<sup>1</sup> Department of Internal medicine, Division of Pulmonary and Critical Care Medicine, The Catholic University of Korea, Seoul, Korea

<sup>2</sup> Department of Internal Medicine, Division of Hematology, The Catholic University of Korea, Seoul, Korea

<sup>3</sup> The Catholic Blood and Marrow Transplantation Center, The Catholic University of Korea, Seoul, Korea

<sup>4</sup> Department of Internal medicine, Division of infectious diseases, The Catholic University of Korea, Seoul, Korea

<sup>5</sup> Vaccine Bio Research Institute, The Catholic University of Korea, Seoul, Korea

\* These authors have contributed equally to this work

**Correspondence to:** Dong Gun Lee, **email:** symonlee@catholic.ac.kr

**Keywords:** cytomegalovirus, pneumonia, real-time polymerase chain reaction, hematologic neoplasms

**Received:** August 04, 2016

**Accepted:** December 27, 2016

**Published:** January 04, 2017

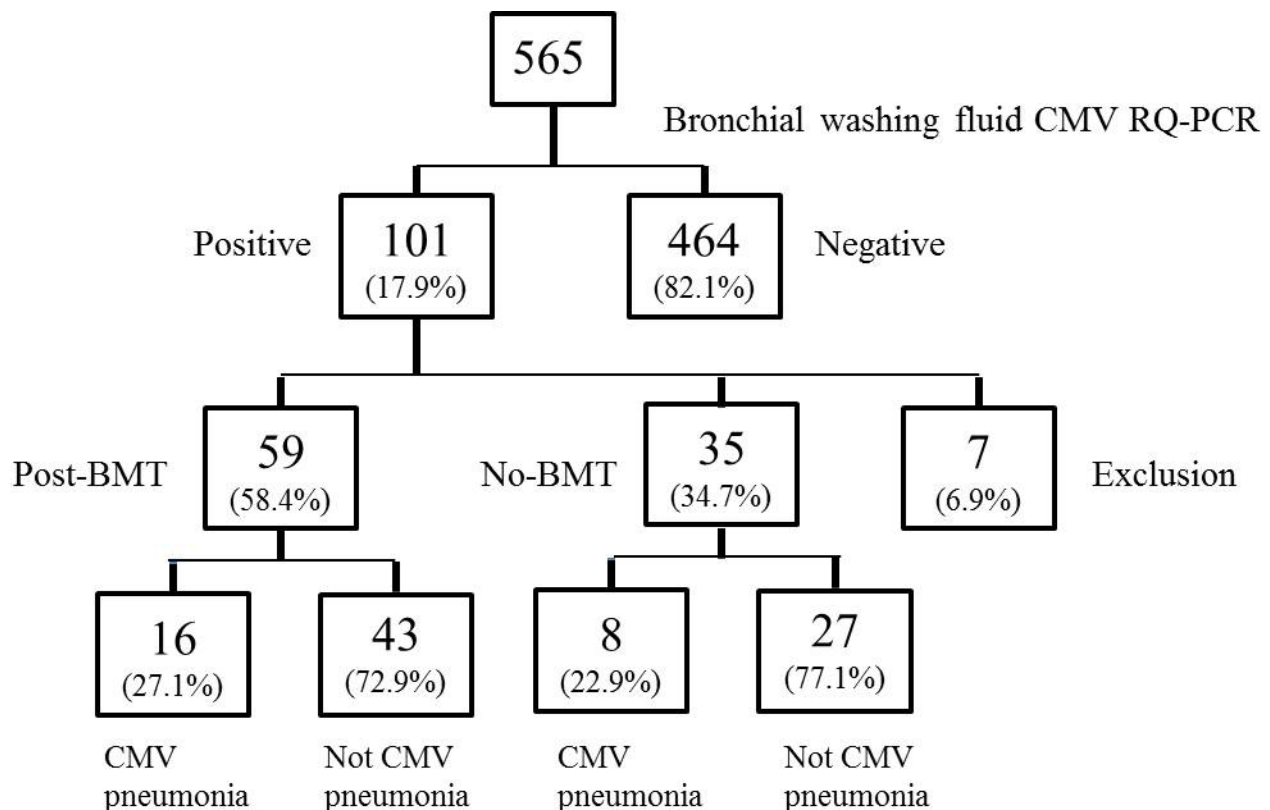

Figure S1: Flow chart of 101 patients who harbored > 380 copies/mL qRT-PCR results in bronchial washing fluid.
